# Supplementary material for: Mn-doped WSe 2 as an efficient electrocatalyst for hydrogen production and as anode material for lithium-ion batteries
Source: Royal Society of Chemistry journal article supplement (doi:10.1039/d4nr04348k), 2024-11-15
Supplement: d4nr04348k1.pdf [file d4nr04348k1.pdf]

## Supporting Information

### Mn-doped WSe<sub>2</sub> as an efficient electrocatalyst for hydrogen production and as anode material for lithium-ion batteries

A. Kagkoura,<sup>a\*</sup> S. Wei,<sup>a</sup> L. Zeng,<sup>b</sup> E. Olsson,<sup>b</sup> F. M. Oliveira,<sup>b</sup> J. Luxa,<sup>a</sup> and Z. Sofer<sup>a\*</sup>

<sup>1</sup>Department of Inorganic Chemistry, Faculty of Chemical Technology, University of Chemistry and Technology Prague, Technická 5, 166 28 Prague 6, Czech Republic

<sup>2</sup>Department of Physics, Chalmers University of Technology, 41296, Göteborg, Sweden

\*Email: kagkourn@vscht.cz, soferz@vscht.cz

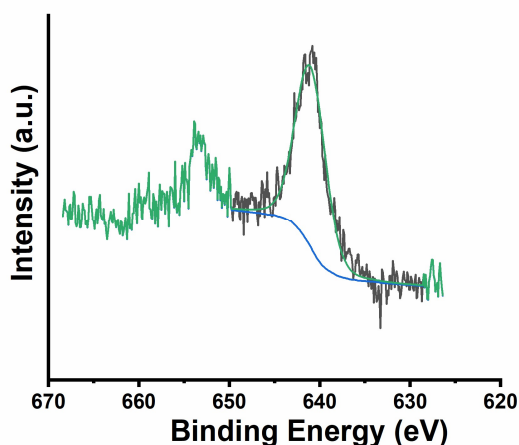

Figure S1. Deconvoluted X-ray photoelectron spectra of Mn 2p for Mn-WSe<sub>2</sub>.

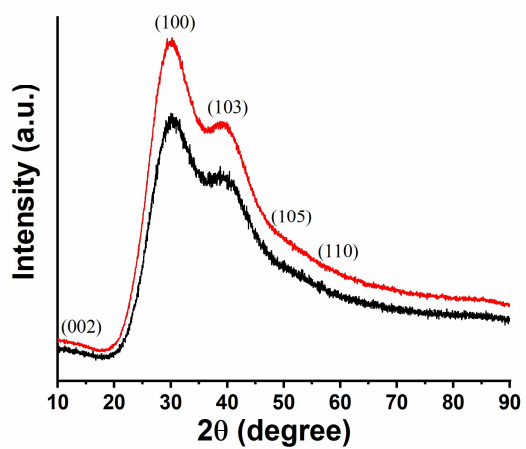

Figure S2. XRD pattern of WSe<sub>2</sub> and Mn-WSe<sub>2</sub>.

Table S1. Electrocatalytic HER parameters in H<sub>2</sub>SO<sub>4</sub> (0.5 M) for all tested materials.

| Material                          | Onset potential (V vs RHE) | Potential (V vs RHE) at -10 mA<br>cm <sup>-2</sup> | Tafel slope<br>[mV dec <sup>-1</sup> ] | Rct [Ω] |
|-----------------------------------|----------------------------|----------------------------------------------------|----------------------------------------|---------|
| Mn-WSe <sub>2</sub>               | -0.077                     | -0.28                                              | 80                                     | 46      |
| Mn-WSe <sub>2</sub> <sup>a)</sup> | -0.077                     | -0.32                                              | 99                                     | -       |
| WSe <sub>2</sub>                  | -0.27                      | -0.43                                              | 153                                    | 299     |
| WSe <sub>2</sub> <sup>a)</sup>    | -0.31                      | -0.51                                              | 146                                    | -       |
| Pt/C                              | -0.017                     | -0.060                                             | 45                                     | 42      |

a) after 10 000 cycles

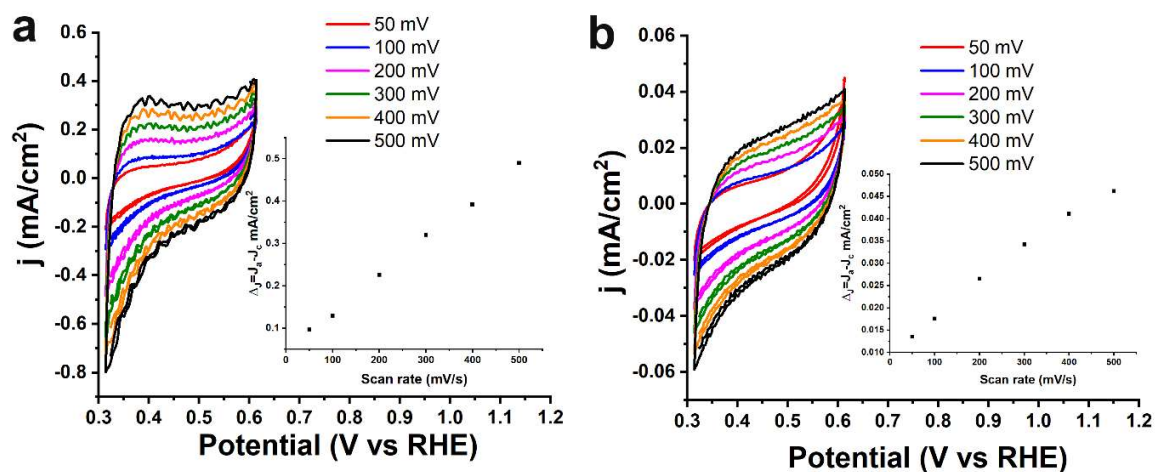

Figure S3. Cyclic voltamographs of (a) Mn-WSe<sub>2</sub> and (b) WSe<sub>2</sub> in a nitrogen saturated aqueous 0.5 M H<sub>2</sub>SO<sub>4</sub> electrolyte, at a rotation speed of 1,600 rpm and scan rates from 50 to 500 mV/s. Inset: Scan rate dependence of the current densities for the corresponding materials.
